# Supplementary material for: Entrepreneurship Through a Unified Sociological Neoinstitutional Lens
Source: Atypon-hosted journal article supplement (doi:10.1287/orsc.2022.1586), 2022-06-16

## Online Appendix

**Table 1 References Selected by the Reference Publication Year Spectroscopy (RPYS)**

| References                                                                                                                                                             | # of citations | % of citations | Cited by ≥ 10% |
|------------------------------------------------------------------------------------------------------------------------------------------------------------------------|----------------|----------------|----------------|
| Schumpeter, J. A. 1934 (1942) <i>Capitalism, Socialism, and Democracy</i> . New York: Harper & Row.                                                                    | 6 (2)          | 8% (3%)        |                |
| Festinger, L. 1957. <i>A Theory of Cognitive Dissonance</i> . Stanford University Press, Stanford, CA.                                                                 | 2              | 3%             |                |
| Selznick P. 1957 <i>Leadership in Administration: A Sociological Interpretation</i> . New York: Harper & Row.                                                          | 6              | 8%             |                |
| Crane D (1965) Scientists at major and minor universities: A study of productivity and recognition. <i>Amer. Sociol. Rev.</i> 30:699–714.                              | 2              | 3%             |                |
| Olson, M., Jr. 1965. <i>The logic of collective action</i> . Cambridge, MA: Harvard University Press.                                                                  | 2              | 3%             |                |
| Ryder, N. 1965. The cohort as a concept in the study of social change. <i>Amer. Sociol. Rev.</i> 30 843–861.                                                           | 2              | 3%             |                |
| <b>Stinchcombe, A. L. (1965). Social Structure and Organization". In J. G. March (ed.), <i>Handbook of Organizations: 142-193</i>. Chicago: Rand McNally &amp; Co.</b> | <b>28</b>      | <b>36%</b>     | *              |
| Granovetter, M. 1973. The strength of weak ties. <i>American Journal of Sociology</i> , 78: 1360-1380.                                                                 | 3              | 4%             |                |
| Kirzner IM (1973) <i>Competition and Entrepreneurship</i> (University of Chicago Press, Chicago).                                                                      | 2              | 3%             |                |
| McCarthy JD, Zald MN (1973) <i>The Trend of Social Movements in America: Professionalization and Resource Mobilization</i> (General Learning Press, Morristown, NJ).   | 2              | 3%             |                |
| Rokeach, M. 1973 <i>The Nature of Human Values</i> . New York: Free Press.                                                                                             | 3              | 4%             |                |
| Spence M (1973) Job market signaling. <i>Quart. J Econom.</i> 87:355–374.                                                                                              | 4              | 5%             |                |
| Blau PM (1977) <i>Inequality and Heterogeneity: A Primitive Theory of Social Structure</i> (Free Press, New York).                                                     | 5              | 6%             |                |
| Hannan MT, Freeman J. 1977. The population ecology of organizations. <i>American Journal of Sociology</i> 82(5): 929–964.                                              | 5              | 6%             |                |

|                                                                                                                                                                                                               |           |            |          |
|---------------------------------------------------------------------------------------------------------------------------------------------------------------------------------------------------------------|-----------|------------|----------|
| Kanter RM (1977) Men and Women of the Corporation (Basic Books, New York).                                                                                                                                    | 3         | 4%         |          |
| McCarthy, J., and M. Zald 1977 "Resource mobilization and social movements: A partial theory." American Journal of Sociology, 82: 1212–1241.                                                                  | 4         | 5%         |          |
| <b>Meyer, J. W., &amp; Rowan, B. (1977). Institutionalized organizations: Formal structure as myth and ceremony. <i>American Journal of Sociology</i>, 83(2), 340-363.</b>                                    | <b>24</b> | <b>31%</b> | <b>*</b> |
| Zucker LG (1977) The role of institutionalization in cultural persistence. Amer. Sociol. Rev. 42:726–743.                                                                                                     | 5         | 6%         |          |
| Barley, S. R. 1983 "Semiotics and the study of occupational and organizational culture." Administrative Science Quarterly, 28: 393–413.                                                                       | 2         | 3%         |          |
| Delacroix, J., G. Carroll. 1983. Organizational foundings: An ecological study of the newspaper industries of Argentina and Ireland. Admin. Sci. Quart. 28(2) 274–291.                                        | 4         | 5%         |          |
| <b>DiMaggio, P. J., &amp; Powell, W. W. (1983). The iron cage revisited: Institutional isomorphism and collective rationality in organizational fields. <i>American Sociological Review</i>, 147-160.</b>     | <b>28</b> | <b>36%</b> | <b>*</b> |
| Freeman J, Carroll GR, Hannan MT. 1983. The liability of newness: age dependence in organizational death rates. American Sociological Review 48: 692–710.                                                     | 4         | 5%         |          |
| Kanter, R. M. 1983 The Change Masters. New York: Simon and Schuster.                                                                                                                                          | 2         | 3%         |          |
| Lewis, V. L., & Churchill, N. C. 1983. The five stages of small business growth. Harvard Business Review, 61(3): 30–50.                                                                                       | 2         | 3%         |          |
| Meyer JW, Scott WR. 1983. Centralization and the legitimacy problems of local government. In Organizational Environments: Ritual and Rationality, Meyer JW, Scott WR (eds). Sage: Beverly Hills, CA; 199–215. | 3         | 4%         |          |
| Morgan, G., P. Frost, and L. R. Pondy 1983 "Organizational symbolism." In L. R. Pondy, P. Frost, G. Morgan, and T. Dandridge (eds.), Organizational Symbolism: 3–35. Greenwich, CT: JAI Press.                | 2         | 3%         |          |
| Scott, W. R., & Meyer, J. 1983. The organization of societal sectors. In J. Meyer & W. R. Scott (Eds.), Organizational environments: Ritual and rationality: 129-154. Beverly Hills, CA: Sage.                | 3         | 4%         |          |
| Tolbert, P. S., L. G. Zucker. 1983. Institutional sources of change in the formal structure of organizations: The diffusion of civil service reform, 1880–1935. Admin. Sci. Quart. 28 22–39.                  | 5         | 6%         |          |
| Aldrich H, Zimmer S (1986) Entrepreneurship through social networks. Sexton D, Smilor R, eds. The Art and Science of Entrepreneurship (Ballinger, Cambridge, MA), 3–                                          | 3         | 4%         |          |

|                                                                                                                                                                                                                                     |           |            |          |
|-------------------------------------------------------------------------------------------------------------------------------------------------------------------------------------------------------------------------------------|-----------|------------|----------|
| 23.                                                                                                                                                                                                                                 |           |            |          |
| Bandura, A. 1986. Social Foundations of Thought and Action: A Social Cognitive Theory. Prentice-Hall, Englewood Cliffs, NJ.                                                                                                         | 2         | 3%         |          |
| Baron, J. N., F. R. Dobbin, P. D. Jennings. 1986. War and peace: The evolution of modern personnel administration in U.S. industry. Amer. J. Sociol. 92 350–383.                                                                    | 2         | 3%         |          |
| Baron, J. N., W. T. Bielby. 1986. The proliferation of job titles in organizations. Admin. Sci. Quart. 31(4) 561–586.                                                                                                               | 2         | 3%         |          |
| Douglas, M. 1986 How Institutions Think. Syracuse, NY: Syracuse University Press.                                                                                                                                                   | 3         | 4%         |          |
| Freeman, J. 1986 “Entrepreneurs as organizational products.” In G. Libecap (ed.), Advances in the Study of Entrepreneurship, Innovation, and Economic Growth, 1: 33–52. Greenwich, CT: JAI Press.                                   | 2         | 3%         |          |
| Hannan, M. T. & Freeman, J. H. 1986. Where do organizational forms come from? Sociological Forum, 1: 50- 72.                                                                                                                        | 2         | 3%         |          |
| Hirsch, P. M. 1986. From ambushes to golden parachutes: Corporate takeovers as an instance of cultural framing and institutional integration. American Journal of Sociology, 91: 800-837.                                           | 2         | 3%         |          |
| Ingh, J. V., Tucker, D. J., & House, R. J. 1986. Organizational legitimacy and the liability of newness. Administrative Science Quarterly, 31: 171–193.                                                                             | 5         | 6%         |          |
| O'Reilly, C. A., III, & Chatman, J. 1986. Organizational commitment and psychological attachment: The effects of compliance, identification, and internalization on prosocial behavior. Journal of Applied Psychology, 71: 492–499. | 3         | 4%         |          |
| Snow DA, Rochford EB, Worden SK, Benford RD (1986) Frame alignment processes, micromobilization, and movement participation. Amer. Sociol. Rev. 51:464–481.                                                                         | 3         | 4%         |          |
| <b>Swidler, A. 1986. Culture in action: Symbols and strategies. American Sociological Review , 51: 273-286.</b>                                                                                                                     | <b>9</b>  | <b>12%</b> | <b>*</b> |
| <b>Tushman, M. L., and P. Anderson 1986 “Technological discontinuities and organizational environments.” Administrative Science Quarterly, 31: 439–465.</b>                                                                         | <b>10</b> | <b>13%</b> | <b>*</b> |
| Zucker, L. G. 1986. Production of trust: Institutional sources of economic structures, 1840-1920. In B. M. Staw and L. L. Cummings (Eds.), Research in organizational behavior. vol. 8: 53-122. Greenwich, CT: JAI Press.           | 4         | 5%         |          |
| Barney, J. B. 1991. Firm resources and sustained competitive advantage. Journal of Management, 17: 99–120.                                                                                                                          | 2         | 3%         |          |
| Baum JA, Oliver C (1991) Institutional linkages and organizational mortality. Admin.                                                                                                                                                | 6         | 8%         |          |

|                                                                                                                                                                                                                                                                         |          |            |          |
|-------------------------------------------------------------------------------------------------------------------------------------------------------------------------------------------------------------------------------------------------------------------------|----------|------------|----------|
| Sci. Quart. 36(2):187–218.                                                                                                                                                                                                                                              |          |            |          |
| Brewer, M. B. 1991. The social self: On being the same and different at the same time. <i>Personality and Social Psychology Bulletin</i> , 17: 475-4                                                                                                                    | 5        | 6%         |          |
| Brint, S., & Karabel, J. 1991. Institutional origins and transformations: The case of American community colleges. In W. W. Powell & P. J. DiMaggio (Eds.), <i>The new institutionalism in organizational analysis</i> : 337-360. Chicago: University of Chicago Press. | 2        | 3%         |          |
| D'Aunno, T. A., Sutton, R. I., & Price, R.H. 1991. Isomorphism and external support in conflicting institutional environments: A study of drug abuse treatment units. <i>Academy of Management Journal</i> , 34: 636-661.                                               | 4        | 5%         |          |
| DiMaggio, P. J. 1991 “Constructing an organizational field as a professional project: U.S. art museums.” In W. W. Powell and P. J. DiMaggio (eds.), <i>The New Institutionalism in Organizational Analysis</i> : 267–292. Chicago: University of Chicago Press.         | 3        | 4%         |          |
| Dutton, J. E., & Dukerich, J. M. 1991. Keeping an eye on the mirror: Image and identity in organizational adaptation. <i>Academy of Management Journal</i> , 34: 517–554.                                                                                               | 7        | 9%         |          |
| Fiske, S., & Taylor, S. 1991. <i>Social cognition</i> (2nd ed.). New York: McGraw-Hill.                                                                                                                                                                                 | 2        | 3%         |          |
| <b>Friedland, R., R. A. Alford. 1991. Bringing society back in: Symbols, practices, and institutional contradictions. W. W. Powell, P. J. DiMaggio, eds. <i>The New Institutionalism in Organizational Analysis</i>. University of Chicago Press, Chicago, 232–263.</b> | <b>8</b> | <b>10%</b> | <b>*</b> |
| Galaskiewicz, J. 1991. Making corporate actors accountable: Institution-building in Minneapolis-St. Paul. In W. W. Powell & P. J. DiMaggio (Eds.), <i>The new institutionalism in organizational analysis</i> : 293– 310. Chicago: University of Chicago Press.         | 2        | 3%         |          |
| Gioia DA, Chittipeddi K (1991) Sensemaking and sensegiving in strategic change initiation. <i>Strategic Management J.</i> 12:433–448.                                                                                                                                   | 3        | 4%         |          |
| Jepperson, R. L. 1991. Institutions, institutional effects, and institutionalism. In W. W. Powell & P. J. DiMaggio (Eds.), <i>The new institutionalism in organizational analysis</i> : 143-163. Chicago: University of Chicago Press.                                  | 4        | 5%         |          |
| Kalleberg AL, Leicht KT (1991) Gender and organizational performance: Determinants of small business survival and success. <i>Acad. Management J.</i> 34(1):136–161.                                                                                                    | 2        | 3%         |          |
| Leblebici, H., Salancik, G. S., Copay, A., & King, T. 1991.                                                                                                                                                                                                             | 5        | 6%         |          |

|                                                                                                                                                                                                                           |           |            |          |
|---------------------------------------------------------------------------------------------------------------------------------------------------------------------------------------------------------------------------|-----------|------------|----------|
| Institutional change and the transformation of interorganizational fields: An organizational history of the U.S. radio broadcasting industry. <i>Administrative Science Quarterly</i> , 36: 333–363.                      |           |            |          |
| Levinthal, D. A. 1991. Random walks and organizational mortality. <i>Admin. Sci. Quart.</i> 36(3) 397–420                                                                                                                 | 2         | 3%         |          |
| Loscocco KA, Robinson J, Hall RH, Allen JK (1991) Gender and small business success: An inquiry into women’s relative disadvantage. <i>Soc. Forces</i> 70(1):65–85.                                                       | 2         | 3%         |          |
| March, J. G. 1991 “Exploration and exploitation in organizational learning.” <i>Organization Science</i> , 2:71–87.                                                                                                       | 2         | 3%         |          |
| Meggison WL, Weiss KA (1991) Venture capitalist certification in initial public offerings. <i>J. Finance</i> 46(3):879–903.                                                                                               | 3         | 4%         |          |
| North, D. (1991). Institutions. <i>Journal of Economic Perspectives</i> , 5(1), 97–112.                                                                                                                                   | 3         | 4%         |          |
| <b>Oliver, C. 1991. Strategic responses to institutional processes. <i>Academy of Management Review</i>, 16: 145179.</b>                                                                                                  | <b>8</b>  | <b>10%</b> | <b>*</b> |
| Powell, W. W. 1991. Expanding the scope of institutional analysis. In W. W. Powell & P. J. DiMaggio (Eds.), <i>The new institutionalism in organizational analysis</i> : 183-203. Chicago: University of Chicago Press.   | 2         | 3%         |          |
| Ranger-Moore, J., Banaszak-Holl, J., & Hannan, M. T. 1991. Density-dependent dynamics in regulated industries: Founding rates of banks and life insurance companies. <i>Administrative Science Quarterly</i> . 36: 36-65. | 2         | 3%         |          |
| Roberts E (1991) <i>Entrepreneurs in High Technology—Lessons from MIT and Beyond</i> (Oxford University Press, New York).                                                                                                 | 2         | 3%         |          |
| Romanelli, E. 1991. The evolution of new organizational forms. <i>Annual Rev. Sociol.</i> 17 79–104.                                                                                                                      | 4         | 5%         |          |
| Scott, W. R. 1991. Unpacking institutional arguments. Walter W. Powell, Paul J. DiMaggio, eds. <i>The New Institutionalism in Organizational Analysis</i> . The University of Chicago Press, Chicago, IL, 164–182         | 4         | 5%         |          |
| Wholey, D. R., and S. M. Sanchez 1991 “The effects of regulatory tools on organizational populations.” <i>Academy of Management Review</i> , 16: 743–767.                                                                 | 2         | 3%         |          |
| Williamson, O. E. 1991. Comparative economic organization: The analysis of discrete structural alternatives. <i>Administrative Science Quarterly</i> , 36: 269–296.                                                       | 2         | 3%         |          |
| <b>Aldrich HE, Fiol CM (1994) Fools rush in? The institutional context of industry creation. <i>Acad. Management Rev.</i> 19(4):645–670.</b>                                                                              | <b>32</b> | <b>42%</b> |          |

|                                                                                                                                                                                                                               |           |            |  |
|-------------------------------------------------------------------------------------------------------------------------------------------------------------------------------------------------------------------------------|-----------|------------|--|
| <b>Rao H. 1994. The social construction of reputation: certification contests, legitimation, and the survival of organizations in the American automobile industry: 1895–1912. Strategic Management Journal 15(8): 29–44.</b> | <b>19</b> | <b>25%</b> |  |
| Cooper, A., Gimeno-Gascon, F. J., & Woo, C. Y. 1994. Initial human and financial capital as predictors of new venture performance. <i>Journal of Business Venturing</i> , 9: 371–395.                                         | 5         | 6%         |  |
| Dutton, J. E., Dukerich, J. M., & Harquail, C. V. 1994. Organizational images and member identification. <i>Administrative Science Quarterly</i> , 39: 239–263.                                                               | 5         | 6%         |  |
| Garud, R., & Rappa, M. A. 1994. A socio-cognitive model of technology evolution: The case of cochlear implants. <i>Organization Science</i> , 5: 344–362.                                                                     | 5         | 6%         |  |
| Aoki, M. 1994. The contingent governance of teams: Analysis of institutional complementarity. <i>International Economic Review</i> , 35: 657–676.                                                                             | 2         | 3%         |  |
| Davis, G. F., and T. A. Thompson 1994 “A social movement perspective on corporate control.” <i>Administrative Science Quarterly</i> , 39: 141–173.                                                                            | 2         | 3%         |  |
| Saxenian, A. 1994 <i>Regional Advantage: Culture and Competition in Silicon Valley and Route 128</i> . Cambridge, MA: Harvard University Press.                                                                               | 6         | 8%         |  |
| Burgelman R (1994) Fading memories: A process theory of strategic business exit in dynamic environments. <i>Admin. Sci. Quart.</i> 39:24–56.                                                                                  | 2         | 3%         |  |
| Henderson RM, Cockburn I (1994) Measuring competence? Exploring firm effects in pharmaceutical research. <i>Strategic Magement J.</i> 15:63–84.                                                                               | 2         | 3%         |  |
| Barron, D. N., E. West, M. T. Hannan. 1994. A time to grow and a time to die: Growth and mortality of credit unions in New York City, 1914–1990. <i>Amer. J. Sociol.</i> 100 381–421.                                         | 2         | 3%         |  |
| Podolny, J. M. 1994. Market uncertainty and the social character of economic exchange. <i>Admin. Sci. Quart.</i> 39 458–483.                                                                                                  | 6         | 8%         |  |
| <b>Elsbach KD (1994) Managing organizational legitimacy in the California cattle industry: The construction and effectiveness of verbal accounts. Admin. Sci. Quart. 39:57–88.</b>                                            | <b>8</b>  | <b>10%</b> |  |
| Kieser A (1994) Why organizational theory needs historical analyses—And how this should be performed. <i>Organ. Sci.</i> 5:608–623.                                                                                           | 2         | 3%         |  |
| Schon, D., & Rein, M. 1994. <i>Frame reflection: Toward the resolution of intractable controversies</i> . New York, NY: Basic Books.                                                                                          | 2         | 3%         |  |
| Lerner, J. 1994. Venture capitalists and the decision to go public. <i>J. Financial Econom.</i> 35 293–316.                                                                                                                   | 2         | 3%         |  |
| Davis, G. F., Diekmann, K. A., & Tinsley, C.H. 1994. The decline and fall of the conglomerate firm in the 1980s: The deinstitutionalization of an organizational form. <i>American Sociological Review</i> , 59: 547–570.     | 2         | 3%         |  |

|                                                                                                                                                                                                                                                        |          |            |          |
|--------------------------------------------------------------------------------------------------------------------------------------------------------------------------------------------------------------------------------------------------------|----------|------------|----------|
| Scott, W. R. 1994. Institutions and organizations: Towards a theoretical synthesis. In W. R. Scott & J. W. Meyer (Eds.), <i>Institutional environments and organizations</i> : 55-80. Thousand Oaks, CA: Sage.                                         | 4        | 5%         |          |
| Baum JAC, Singh JV. 1994. Organizational niches and the dynamics of organizational founding. <i>Organization Science</i> 5(4): 483–501.                                                                                                                | 2        | 3%         |          |
| Mitchell W. 1994. The dynamics of evolving markets: the effects of business sales and age on dissolutions and divestitures. <i>Administrative Science Quarterly</i> 39: 575–602.                                                                       | 2        | 3%         |          |
| Ashforth BE, Humphrey RH (1997) The ubiquity and potency of labeling in organizations. <i>Organ. Sci.</i> 8(1):43–58.                                                                                                                                  | 6        | 8%         |          |
| Barley, S. R., and P. S. Tolbert 1997 “Institutionalization and structuration: Studying the links between action and institution.” <i>Organization Studies</i> , 18 (1): 93–117.                                                                       | 6        | 8%         |          |
| Barnett, W. P. 1997 “The dynamics of competitive intensity.” <i>Administrative Science Quarterly</i> , 42: 128–160.                                                                                                                                    | 2        | 3%         |          |
| Barry D, Elmes M (1997) Strategy retold: Toward a narrative view of strategic discourse. <i>Acad. Management Rev.</i> 22(2):429–452.                                                                                                                   | 3        | 4%         |          |
| <b>Brown, S. L., and K. M. Eisenhardt 1997 “The art of continuous change: Linking complexity theory and time-paced evolution in relentlessly shifting organizations.” <i>Administrative Science Quarterly</i>, 42: 1–34</b>                            | <b>8</b> | <b>10%</b> | <b>*</b> |
| Busenitz, L. W., & Barney, J. B. 1997. Differences between entrepreneurs and managers in large organizations: Biases and heuristics in strategic decision-making. <i>Journal of Business Venturing</i> , 12: 9-30.                                     | 3        | 4%         |          |
| Christensen C (1997) <i>The Innovator’s Dilemma: When New Technologies Cause Great Firms to Fail</i> (Harvard Business Review Press, Boston).                                                                                                          | 2        | 3%         |          |
| Clemens, E. S. 1997. <i>The People’s Lobby</i> . University of Chicago Press, Chicago.                                                                                                                                                                 | 2        | 3%         |          |
| Dacin, M. T. 1997 "Isomorphism in context: The power and prescription of institutional norms." <i>Academy of Management Journal</i> . 40: 46-82.                                                                                                       | 2        | 3%         |          |
| Deeds, D. L., Decarolis, D., & Coombs, J. E. 1997. The impact of firm specific capabilities on the amount of capital raised in an initial public offering: Evidence from the biotechnology industry. <i>Journal of Business Venturing</i> , 12: 31–46. | 2        | 3%         |          |
| DiMaggio, P. J. 1997. Culture and cognition. <i>Annual Review of Sociology</i> , 23: 263-287.                                                                                                                                                          | 3        | 4%         |          |
| Dobbin, F., and T. J. Dowd 1997 “How policy shapes competition: Early railroad foundings in Massachusetts.” <i>Administrative Science Quarterly</i> , 42: 501–529.                                                                                     | 7        | 9%         |          |
| Fligstein, N. 1997. Social skills and institutional theory. <i>The American Behavioral</i>                                                                                                                                                             | 4        | 5%         |          |

|                                                                                                                                                                                                                        |          |            |          |
|------------------------------------------------------------------------------------------------------------------------------------------------------------------------------------------------------------------------|----------|------------|----------|
| Scientist, 40: 397–405.                                                                                                                                                                                                |          |            |          |
| Geletkanycz MA, Hambrick DC. 1997. The external ties of top executives: implications for strategic choice and performance. <i>Administrative Science Quarterly</i> 42: 654–681.                                        | 2        | 3%         |          |
| Gimeno J, Folta TB, Cooper AC, Woo CY (1997) Survival of the fittest? Entrepreneurial human capital and the persistence of underperforming firms. <i>Admin. Sci. Quart.</i> 42:750–783.                                | 5        | 6%         |          |
| Golden-Biddle, K., & Rao, H. 1997. Breaches in the boardroom: Organizational identity and conflicts of commitment in a nonprofit organization. <i>Organization Science</i> , 8: 593–611.                               | 2        | 3%         |          |
| Hannan, M. T. 1997 “Inertia, density, and the structure of organizational populations: Entries in European automobile industries, 1886–1981.” <i>Organization Studies</i> , 18: 193–228.                               | 2        | 3%         |          |
| Hargadon A, Sutton R (1997) Technology brokering and innovation in a product development firm. <i>Admin. Sci. Quart.</i> 42:716–749.                                                                                   | 2        | 3%         |          |
| <b>Haveman, H. A., &amp; Rao, H. 1997. Structuring a theory of moral sentiments: Institutional and organizational coevaluation in the early thrift industry. <i>American Journal of Sociology</i>, 102: 1606-1651.</b> | <b>9</b> | <b>12%</b> | <b>*</b> |
| Khanna, T., & Palepu, K. 1997. Why focused strategies may be wrong for emerging markets. <i>Harvard Business Review</i> , 75: 41–48.                                                                                   | 4        | 5%         |          |
| Kirzner, I. M. 1997. Entrepreneurial discovery and the competitive market process: An Austrian approach. <i>Journal of Economic Literature</i> , 35: 60–85.                                                            | 3        | 4%         |          |
| Low MB, Abrahamson E (1997) Movements, bandwagons, and clones: Industry evolution and the entrepreneurial process. <i>J. Bus. Venturing</i> 12:435–457.                                                                | 4        | 5%         |          |
| Luo, Y. 1997. Partner selection and venturing success: The case of joint ventures with firms in People's Republic of China. <i>Organization Science</i> , 8: 648-662.                                                  | 2        | 3%         |          |
| Miller, C. C., Cardinal, L. B., & Glick, W. H. 1997. Retrospective reports in organizational research: A reexamination of recent evidence. <i>Academy of Management Journal</i> , 40: 189–204.                         | 2        | 3%         |          |
| Minkoff, D. C. 1997. The sequencing of social movements. <i>Amer. Sociol. Rev.</i> 62(5) 779–799.                                                                                                                      | 2        | 3%         |          |
| Moore, D. P., & Buttner, E. H. 1997. <i>Women entrepreneurs: Moving beyond the glass ceiling</i> . Thousand Oaks, CA: Sage                                                                                             | 2        | 3%         |          |
| <b>Ocasio W. 1997. Towards an attention-based view of the firm. <i>Strategic</i></b>                                                                                                                                   | <b>8</b> | <b>10%</b> | <b>*</b> |

| <b>Management Journal, Summer Special Issue 18: 187–206.</b>                                                                                                                                                                                                                                                                                               |   |    |  |
|------------------------------------------------------------------------------------------------------------------------------------------------------------------------------------------------------------------------------------------------------------------------------------------------------------------------------------------------------------|---|----|--|
| Oliver, C. 1997. Sustainable competitive advantage: Combining institutional and resource-based views. <i>Strategic Management J.</i> 18(9) 697–713.                                                                                                                                                                                                        | 4 | 5% |  |
| Peteraf M, Shanley M. 1997. Getting to know you: a theory of strategic group identity. <i>Strategic Management Journal, Summer Special Issue 18:</i> 165–186.                                                                                                                                                                                              | 2 | 3% |  |
| Peterson, R. A. 1997 <i>Creating Country Music: Fabricating Authenticity.</i> Chicago: University of Chicago Press.                                                                                                                                                                                                                                        | 2 | 3% |  |
| Reynolds, P. D., S. B. White. 1997. <i>The Entrepreneurial Process: Economic Growth, Men, Women, and Minorities.</i> Quorum Books, Westport, CT.                                                                                                                                                                                                           | 2 | 3% |  |
| Stinchcombe AL (1997) On the virtues of the old institutionalism. <i>Ann. Rev. Sociol.</i> 23:1–18                                                                                                                                                                                                                                                         | 2 | 3% |  |
| Teece DJ, Pisano G, Shuen A (1997) Dynamic capabilities and strategic management. <i>Strategic Management J.</i> 18:509–533.                                                                                                                                                                                                                               | 2 | 3% |  |
| Uzzi, B. 1997. Social structure and competition in interfirm networks: The paradox of embeddedness. <i>Admin. Sci. Quart.</i> 42(1) 35–67.                                                                                                                                                                                                                 | 3 | 4% |  |
| Venkataraman, S. 1997 “The distinctive domain of entrepreneurship research: An editor’s perspective.” In J. Katz and R. Brockhaus (eds.), <i>Advances in Entrepreneurship, Firm Emergence, and Growth</i> , 3: 119–138. Greenwich, CT: JAI Press.                                                                                                          | 3 | 4% |  |
| Ahuja G, Lampert C (2001) Entrepreneurship in the large corporation: A longitudinal study of how established firms create technological breakthroughs. <i>Strategic Management J.</i> 22:521–543.                                                                                                                                                          | 2 | 3% |  |
| Aldrich, H. E., & Baker, T. 2001. Learning and legitimacy: Entrepreneurial responses to constraints on the emergence of new populations and organizations. In C. B. Schoonhoven & E. Romanelli (Eds.), <i>The entrepreneurship dynamic: Origins of entrepreneurship and the evolution of industries:</i> 207-235. Stanford, CA: Stanford University Press. | 2 | 3% |  |
| Aldrich, H. E., and M. A. Martinez 2001 “Many are called, but few are chosen: An evolutionary perspective for the study of entrepreneurship.” <i>Entrepreneurship, Theory and Practice</i> , 25: 41–56.                                                                                                                                                    | 3 | 4% |  |
| Amit, R., & Zott, C. 2001. Value creation in e-business. <i>Strategic Management Journal.</i> 22: 49                                                                                                                                                                                                                                                       | 2 | 3% |  |
| Baron, J. N., Hannan, M. T., & Burton, M. D. 2001. Labor pains: Change in organizational models and employee turnover in young, high-tech firms. <i>American</i>                                                                                                                                                                                           | 2 | 3% |  |

|                                                                                                                                                                                                                                                                           |           |            |          |
|---------------------------------------------------------------------------------------------------------------------------------------------------------------------------------------------------------------------------------------------------------------------------|-----------|------------|----------|
| Journal of Sociology, 106: 960-1012                                                                                                                                                                                                                                       |           |            |          |
| Baum, J. R., E. A. Locke, K. G. Smith. 2001. A multidimensional model of venture growth. <i>Acad. Management J.</i> 44(2) 292–303.                                                                                                                                        | 2         | 3%         |          |
| Brush, C. G., P. G. Greene, and M. M. Hart 2001 “From initial idea to unique advantage: The entrepreneurial challenge of constructing a resource base.” <i>Academy of Management Executive</i> , 15 (1): 64–78                                                            | 2         | 3%         |          |
| Carpenter, M. A., Sanders, G., & Gregersen, H. B. (2001). Bundling human capital with organizational context: The impact of international assignment experience on multinational firm performance and CEO pay. <i>The Academy of Management Journal</i> , 44(3), 493–511. | 2         | 3%         |          |
| Correll, S. J. 2001 “Gender and the career choice process: The role of biased self-assessments.” <i>American Journal of Sociology</i> , 106: 1691–1730.                                                                                                                   | 2         | 3%         |          |
| Delios, A., & Beamish, P. W. (2001). Survival and profitability: The roles of experience and intangible assets in foreign subsidiary performance. <i>The Academy of Management Journal</i> , 44(5), 1028–1038.                                                            | 2         | 3%         |          |
| Dobrev, S. D., T.-Y. Kim, and M. T. Hannan 2001 “Dynamics of niche width and resource partitioning.” <i>American Journal of Sociology</i> , 106: 1299–1337.                                                                                                               | 2         | 3%         |          |
| Fleming L (2001) Recombinant uncertainty in technological search. <i>Management Sci.</i> 47:117–132.                                                                                                                                                                      | 2         | 3%         |          |
| Fligstein N (2001) <i>The Architecture of Markets: An Economic Sociology of Twenty-First-Century Capitalist Societies</i> (Princeton University Press, Princeton, NJ).                                                                                                    | 3         | 4%         |          |
| Fligstein, N. 2001 “Social skill and the theory of fields.” <i>Social Theory</i> , 19: 105–125.                                                                                                                                                                           | 3         | 4%         |          |
| Greene PG, Brush CG, Hart MM, Saporito P (2001) Patterns of venture capital funding: Is gender a factor? <i>Venture Capital</i> 3(1): 63–83.                                                                                                                              | 2         | 3%         |          |
| Hall BH, Ziedonis RH (2001) The patent paradox revisited. An empirical study of patenting in the U.S. <i>RAND J. Econom.</i> 32: 101–128.                                                                                                                                 | 2         | 3%         |          |
| Hall, P. A., and D. W. Soskice 2001 “An introduction to varieties of capitalism.” In P. A. Hall and D. W. Soskice (eds.), <i>Varieties of Capitalism: The Institutional Foundations of Comparative Advantage</i> : 1–70. Oxford: Oxford University Press.                 | 2         | 3%         |          |
| <b>Hargadon, A. B., &amp; Douglas, Y. 2001. When innovations meet institutions: Edison and the design of the electric light. <i>Administrative Science Quarterly.</i> 46: 47</b>                                                                                          | <b>14</b> | <b>18%</b> | <b>*</b> |
| Haveman, H. A., M. V. Russo, and A. D. Meyer 2001 “Organizational environments in flux: The impact of regulatory punctuations on organizational domains, CEO succession,                                                                                                  | 2         | 3%         |          |

|                                                                                                                                                                                                                                          |           |            |          |
|------------------------------------------------------------------------------------------------------------------------------------------------------------------------------------------------------------------------------------------|-----------|------------|----------|
| and performance.” Organization Science, 12: 253–273.                                                                                                                                                                                     |           |            |          |
| Hite, J. M., & Hesterly, W. S. 2001. The evolution of firm networks: From emergence to early growth of the firm. Strategic Management Journal, 22: 275–286.                                                                              | 2         | 3%         |          |
| Hoffman AJ, Ocasio W (2001) Not all events are attended equally: Toward a middle-range theory of industry attention to external events. Organ. Sci. 12:414–434.                                                                          | 3         | 4%         |          |
| Klepper S (2001) Employee start-ups in high-tech industries. Indust. Corporate Change 10(3):639–674.                                                                                                                                     | 2         | 3%         |          |
| Lee PM (2001) What’s in a name.com? The effects of “.com” name changes on stock prices and trading activity. Strategic Management J. 21(8):793–804.                                                                                      | 3         | 4%         |          |
| Locke, K. 2001. Grounded theory in management research. Thousand Oaks, CA: Sage.                                                                                                                                                         | 2         | 3%         |          |
| <b>Lounsbury M, Glynn MA (2001) Cultural entrepreneurship: Stories, legitimacy, and the acquisition of resources. Strategic Management J. 22(6/7):545–564.</b>                                                                           | <b>24</b> | <b>31%</b> | <b>*</b> |
| Lounsbury, M. 2001 “Institutional sources of practice variation: Staffing college and university recycling programs.” Administrative Science Quarterly, 46: 29–56.                                                                       | 4         | 5%         |          |
| McKendrick DG, Carroll G. 2001. On the genesis of organizational forms: evidence from the market for disk drive arrays. Organization Science 12(6): 661–682.                                                                             | 4         | 5%         |          |
| McPherson M, Smith-Lovin L, Cook JM (2001) Birds of a feather: Homophily in social networks. Annual Rev. Sociol. 27:415–444.                                                                                                             | 3         | 4%         |          |
| Miner AS, Bassof P, Moorman C (2001) Organizational improvisation and learning: A field study. Admin. Sci. Quart. 46(2):304–337.                                                                                                         | 3         | 4%         |          |
| Park SH, Luo Y. 2001. Guanxi and organizational dynamics: organizational networking in Chinese firms. Strategic Management Journal 22(5): 455–477.                                                                                       | 2         | 3%         |          |
| Phillips, D. J., and E. W. Zuckerman 2001 “Middle-status conformity: Theoretical restatement and empirical demonstration in two markets.” American Journal of Sociology, 107: 379–429.                                                   | 5         | 6%         |          |
| Podolny, J. M. 2001 “Networks as the pipes and prisms of the market: A look at investment decisions in the venture capital industry.” American Journal of Sociology, 107: 33–60.                                                         | 3         | 4%         |          |
| Rindova, V. P., & Fombrun, C. J. 2001. Entrepreneurial action in the creation of the specialty coffee niche. In C. B. Schoonhoven & E. Romanelli (Eds.), The entrepreneurship dynamic: 236–261. Stanford, CA: Stanford University Press. | 6         | 8%         |          |
| Rindova, V., & Kotha, S. 2001. Continuous “morphing”: Competing through dynamic capabilities, form, and function. Academy of Management Journal, 44: 1263–1280.                                                                          | 5         | 6%         |          |

|                                                                                                                                                                                                                                                                                            |           |            |          |
|--------------------------------------------------------------------------------------------------------------------------------------------------------------------------------------------------------------------------------------------------------------------------------------------|-----------|------------|----------|
| RudmanLA, Glick P (2001) Prescriptive gender stereotypes and backlash toward agentic women. <i>J. Soc. Issues</i> 57(4):743–762.                                                                                                                                                           | 2         | 3%         |          |
| Russo MV (2001) Institutions, exchange relations, and the emergence of new fields: Regulatory policies and independent power production in America, 1978–1992. <i>Admin. Sci. Quart.</i> 46(1):57–86.                                                                                      | 5         | 6%         |          |
| Sarasvathy, S. D. 2001. Causation and effectuation: Toward a theoretical shift from economic inevitability to entrepreneurial contingency. <i>Academy of Management Review</i> , 26: 243-263.                                                                                              | 4         | 5%         |          |
| Schneiberg M, Bartley T (2001) Regulating American industries: Market, politics, and the institutional determinants of fire insurance regulation. <i>Amer. J. Sociol.</i> 107(1):101–146.                                                                                                  | 3         | 4%         |          |
| Schoonhoven, C. B., and E. Romanelli (eds.) 2001 <i>The Entrepreneurship Dynamic</i> . Stanford, CA: Stanford University Press.                                                                                                                                                            | 4         | 5%         |          |
| Scott WR (2001) <i>Institutions and Organizations</i> , 2nd ed. (Sage, Thousand Oaks, CA).                                                                                                                                                                                                 | 5         | 6%         |          |
| Strang, D., and E. Bradburn 2001 “Theorizing legitimacy or legitimating theory? Neoliberal discourse and HMO policy, 1970–89.” In J. L. Campbell and O. Pedersen (eds.), <i>The Rise of Neoliberalism and Institutional Analysis</i> : 129–158. Princeton, NJ: Princeton University Press. | 2         | 3%         |          |
| Swaminathan, A., and J. B. Wade 2001 “Social movement theory and the evolution of new organizational forms.” In C. B. Schoonhoven and E. Romanelli (eds.), <i>The Entrepreneurship Dynamic in Industry Evolution</i> : 286–313. Stanford, CA: Stanford University Press.                   | 6         | 8%         |          |
| White, H. C. 2001. <i>Markets from Networks: Socioeconomic Models of Production</i> . Princeton University Press, Princeton, NJ.                                                                                                                                                           | 2         | 3%         |          |
| Winter SG, Szulanski G (2001) Replication as strategy. <i>Organ. Sci.</i> 12(6):730–743.                                                                                                                                                                                                   | 2         | 3%         |          |
| <b>Baker, T., &amp; Nelson, R. E. . 2005. Creating something from nothing: Resource construction through entrepreneurial bricolage. <i>Administrative Science Quarterly</i>, 50: 329366.</b>                                                                                               | <b>10</b> | <b>13%</b> | <b>*</b> |
| Barringer, B. R., Jones, F. F., & Neubaum, D. O. (2005). A quantitative content analysis of the characteristics of rapid-growth firms and their founders. <i>Journal of Business Venturing</i> , 20(5), 663–687.                                                                           | 2         | 3%         |          |
| Bonardi, J. P., Hillman, A., & Keim, G. 2005. The attractiveness of political markets: Implications for firm strategy. <i>Academy of Management Review</i> , 30: 397–413.                                                                                                                  | 2         | 3%         |          |

|                                                                                                                                                                                                                                                                |          |            |          |
|----------------------------------------------------------------------------------------------------------------------------------------------------------------------------------------------------------------------------------------------------------------|----------|------------|----------|
| Carroll, G. R., & Khessina, O. M. 2005. The ecology of entrepreneurship. In S. A. Alvarez, R. Agarwal, & O. Sorenson (Eds.), Handbook of entrepreneurship research: Disciplinary perspectives: 167–200. New York: Springer.                                    | 3        | 4%         |          |
| Clemens, E. S. 2005 “Two kinds of stuff: The current encounter of social movements and organizations.” In G. F. Davis, D. McAdam, W. R. Scott, and M. N. Zald (eds.), Social Movements and Organization Theory: 351–366. New York: Cambridge University Press. | 2        | 3%         |          |
| Dobrev SD, Barnett WP (2005) Organizational roles and transition to entrepreneurship. Acad. Management J. 48(3):433–449.                                                                                                                                       | 5        | 6%         |          |
| Dorado S (2005) Institutional entrepreneurship, partaking, and convening. Organ. Stud. 26(3):385–414.                                                                                                                                                          | 2        | 3%         |          |
| Dushnitsky, G., & Lenox, M. J. 2005. When do firms undertake R&D by investing in new ventures? Strategic Management Journal, 26: 947–965.                                                                                                                      | 2        | 3%         |          |
| Ferraro, F., Pfeffer, J., & Sutton, R. I. 2005. Economics language and assumptions: How theories can become self-fulfilling. Academy of Management Review, 30: 8–24.                                                                                           | 2        | 3%         |          |
| Gavetti, G., Levinthal D. A., & Rivkin, J. W. 2005. Strategymaking in novel and complex worlds: The power of analogy. Strategic Management Journal, 26: 691-712.                                                                                               | 5        | 6%         |          |
| George AL, Bennett A (2005) Case Studies and Theory Development in the Social Sciences (MIT Press, Cambridge, MA).                                                                                                                                             | 2        | 3%         |          |
| Glynn, M. A., & Lounsbury, M. 2005. From the critic's comer: Logic blending, discursive change and authenticity in a cultural production system. Journal of Management Studies, 42: 1031-1055.                                                                 | 3        | 4%         |          |
| Gompers P, Lerner J, Scharfstein DS (2005) Entrepreneurial spawning: Public corporations and the genesis of new ventures, 1986 to 1999. J. Finance 60(2):577–614.                                                                                              | 3        | 4%         |          |
| Hall BH, Jaffe AB, Trajtenberg M (2005) Market value and patent citations. RAND J. Econom. 36(1):16–38.                                                                                                                                                        | 2        | 3%         |          |
| Hannan, M. T. 2005. “Ecologies of organizations: Diversity and identity.” Journal of Economic Perspectives, 19: 51–70.                                                                                                                                         | 3        | 4%         |          |
| <b>Hsu, G., and M. T. Hannan 2005 “Identities, genres, and organizational forms.” Organization Science, 16: 474–490.</b>                                                                                                                                       | <b>9</b> | <b>12%</b> | <b>*</b> |
| Hwang, H., & Powell, W. 2005. Institutions and entrepreneurship. In S. Alvarez, R. Agarwal, & O. Sorenson (Eds.), Handbook of entrepreneurship research Disciplinary perspectives: 201-232. New York Springer.                                                 | 5        | 6%         |          |

|                                                                                                                                                                                                                                                                   |   |    |  |
|-------------------------------------------------------------------------------------------------------------------------------------------------------------------------------------------------------------------------------------------------------------------|---|----|--|
| Kennedy MT (2005) Behind the one-way mirror: Refraction in the construction of product market categories. <i>Poetics</i> 33:201–226.                                                                                                                              | 3 | 4% |  |
| King AA, Lenox MJ, Terlaak A. 2005. The strategic use of decentralized institutions: exploring certification with the ISO 14001 management standard. <i>Academy of Management Journal</i> 48(6): 1091–1106.                                                       | 5 | 6% |  |
| Klepper S, Sleeper S (2005) Entry by spin-offs. <i>Management Sci.</i> 51(8): 1291–1306.                                                                                                                                                                          | 3 | 4% |  |
| Lazear, E. P. 2005 “Entrepreneurship.” <i>Journal of Labor Economics</i> , 23: 649–680.                                                                                                                                                                           | 3 | 4% |  |
| Lounsbury M (2005) Institutional variation in the evolution of social movements: The spread of recycling advocacy groups. Davis J, McAdam D, Scott WR, Zald M, eds. <i>Social Movements and Organization Theory</i> (Oxford University Press, Oxford, UK), 73–95. | 2 | 3% |  |
| Marlow S, Patton D (2005) All credit to men? Entrepreneurship, finance, and gender. <i>Entrepreneurship Theory Practice</i> 29(6): 717–735.                                                                                                                       | 2 | 3% |  |
| McAdam, D., and W. R. Scott 2005 “Organizations and movements.” In G. F. Davis, D. McAdam, W. R. Scott, and M. N. Zald (eds.), <i>Social Movements and Organizational Theory</i> : 4–40. New York: Cambridge University Press.                                    | 2 | 3% |  |
| Munir, K. A., & Phillips, N. 2005. The birth of the “Kodak moment”: Institutional entrepreneurship and the adoption of new technologies. <i>Organization Studies</i> , 26: 1665–1687.                                                                             | 3 | 4% |  |
| Powell, W. W., D. R. White, K. W. Koput, and J. Owen-Smith. 2005. “Network dynamics and field evolution: The growth of inter-organizational collaboration in the life sciences.” <i>American Journal of Sociology</i> , 110: 1132–1205.                           | 3 | 4% |  |
| Rao H, Monin P, Durand R (2005) Border crossing: Bricolage and the erosion of categorical boundaries in French gastronomy. <i>Amer. Sociol. Rev.</i> 70(6):968–91.                                                                                                | 5 | 6% |  |
| Rindova, V. P., Williamson, I. O., Petkova, A. P., & Sever, J. M. (2005). Being good or being known: An empirical examination of the dimensions, antecedents, and consequences of organizational reputation. <i>Academy of Management Journal</i> 48: 1033–1049   | 3 | 4% |  |
| Romanelli, E., O. M. Khessina. 2005. Regional industrial identity: Cluster configurations and economic development. <i>Organ. Sci.</i> 16(4) 334–35                                                                                                               | 4 | 5% |  |
| Rothaermel FT, Thursby M. 2005. University-incubator firm knowledge flows: assessing their impact on incubator firm performance. <i>Research Policy</i> 34(3): 305–320.                                                                                           | 2 | 3% |  |
| Santos, F. M., & Eisenhardt, K. M. 2005. Organizational boundaries and theories of                                                                                                                                                                                | 3 | 4% |  |

|                                                                                                                                                                                                                                                                                                                 |           |            |          |
|-----------------------------------------------------------------------------------------------------------------------------------------------------------------------------------------------------------------------------------------------------------------------------------------------------------------|-----------|------------|----------|
| organization. <i>Organization Science</i> , 16: 491–508.                                                                                                                                                                                                                                                        |           |            |          |
| Schneiberg, M., & Soule, S. 2005. Institutionalization as a contested, multi-level process: The case of rate regulation in American fire insurance. In G. Davis, D. McAdam, W. R. Scott, & M. Zald (Eds.), <i>Social movements and organization theory</i> : 122–160. New York, NY: Cambridge University Press. | 2         | 3%         |          |
| <b>Sine WD, Haveman HA, Tolbert PS (2005) Risky business? Entrepreneurship in the new independent-power sector. <i>Admin. Sci. Quart.</i> 50(2):200–232.</b>                                                                                                                                                    | <b>17</b> | <b>22%</b> | <b>*</b> |
| Strohmeyer, R., and V. Tonoyan 2005 “Bridging the gender gap in employment growth: On the role of innovativeness and occupational segregation.” <i>International Journal of Entrepreneurship and Innovation</i> , 6: 259–273.                                                                                   | 2         | 3%         |          |
| <b>Suddaby, R., &amp; Greenwood, R. 2005. Rhetorical strategies of legitimacy. <i>Administrative Science Quarterly</i>, 50: 35–67</b>                                                                                                                                                                           | <b>9</b>  | <b>12%</b> | <b>*</b> |
| Weber, K. 2005. A toolkit for analyzing corporate cultural toolkits. <i>Poetics</i> . 33: 227-252.                                                                                                                                                                                                              | 2         | 3%         |          |
| Weick, K. E., Sutcliffe, K. M., & Obstfeld, D. 2005. Organizing and the process of sensemaking. <i>Organization Science</i> , 16: 409-421.                                                                                                                                                                      | 3         | 4%         |          |
| Zald, M. N., C. Morrill, and H. Rao 2005 “The impact of social movements on organizations: Environments and responses.” In G. F. Davis, D. McAdam, W. R. Scott, and M. N. Zald (eds.), <i>Social Movements and Organization Theory</i> : 253–279. New York: Cambridge University Press.                         | 2         | 3%         |          |
| Ahl, H. 2006 “Why research on women entrepreneurs needs new directions.” <i>Entrepreneurship Theory and Practice</i> , 30: 595–621.                                                                                                                                                                             | 2         | 3%         |          |
| <b>Aldrich, H., M. Ruef. 2006. <i>Organizations Evolving</i>, 2nd ed. Sage, London.</b>                                                                                                                                                                                                                         | <b>15</b> | <b>19%</b> | <b>*</b> |
| Audia PG, Freeman JH, Reynolds PD (2006) Organizational foundings in community context: Instruments manufacturers and their interrelationship with other organizations. <i>Admin. Sci. Quart.</i> 51(3):381–419.                                                                                                | 3         | 4%         |          |
| Austin J, Stevenson H, WeiSkillern J (2006) Social and commercial entrepreneurship: Same, different, or both? <i>Entrepreneurship Theory Practice</i> 30(1):1–22.                                                                                                                                               | 3         | 4%         |          |
| Baron, R. A., & Ensley, M. 2006. Opportunity recognition as the detection of meaningful patterns: Evidence from comparisons of novice and experienced entrepreneurs. <i>Management Science</i> , 52: 1331-1344.                                                                                                 | 2         | 3%         |          |
| Beckman, C. M. 2006 “The influence of founding team company affiliations on firm behavior.” <i>Academy of Management Journal</i> , 49: 741–758.                                                                                                                                                                 | 3         | 4%         |          |
| Berube, D. M. 2006. Nano-Hype: The Truth Behind the Nanotechnology Buzz.                                                                                                                                                                                                                                        | 3         | 4%         |          |

|                                                                                                                                                                                                                                           |   |    |  |
|-------------------------------------------------------------------------------------------------------------------------------------------------------------------------------------------------------------------------------------------|---|----|--|
| Prometheus Books, Amherst, NY.                                                                                                                                                                                                            |   |    |  |
| Cliff, J. E., P. D. Jennings, and R. Greenwood 2006 “New to the game and questioning the rules: The experiences and beliefs of founders who start imitative versus innovative firms.” <i>Journal of Business Venturing</i> , 21: 633–663. | 3 | 4% |  |
| Corley, K. G., Harquail, C. V., Pratt, M. G., Glynn, M. A., Fiol, C. M., & Hatch, M. J. 2006. Guiding organizational identity through aged adolescence. <i>Journal of Management Inquiry</i> , 15: 85–99.                                 | 2 | 3% |  |
| Dobrev, S. D., & Kim, T.-Y. (2006). Positioning among organizations in a population: Moves between market segments and the evolution of industry structure. <i>Administrative Science Quarterly</i> , 51(2), 230–261.                     | 2 | 3% |  |
| Fiss, P. C., & Zajac, E. J. 2006. The symbolic management of strategic change: Sensegiving via framing and decoupling. <i>Academy of Management Journal</i> , 49: 1173-1193.                                                              | 6 | 8% |  |
| Freeman, J. H., & Audia, P. G. 2006. Community ecology and the sociology of organizations. In K. S. Cook & D. S. Massey (Eds.), <i>Annual review of sociology</i> , vol. 32: 145–169. Palo Alto, CA: Annual Reviews.                      | 2 | 3% |  |
| Greenwood, R., & Suddaby, R. 2006. Institutional entrepreneurship in mature fields: The big five accounting firms. <i>Academy of Management Journal</i> , 49: 27-48.                                                                      | 7 | 9% |  |
| Greve, H. R., J. Posner, and H. Rao 2006 “Vox populi: Resource partitioning, organizational proliferation, and the cultural impact of the insurgent microradio movement.” <i>American Journal of Sociology</i> , 112: 802–837.            | 2 | 3% |  |
| Haveman H, Rao H (2006) Hybrid forms and the evolution of thrifts. <i>Amer. Behavioral Sci.</i> 49(7):974–986.                                                                                                                            | 2 | 3% |  |
| Higgins, M. C., & Gulati, R. 2006. Stacking the deck: The effects of top management backgrounds on investor decisions. <i>Strategic Management Journal</i> , 27: 1–25.                                                                    | 2 | 3% |  |
| Hsu, G. (2006). Evaluative schemas and the attention of critics in the US film industry. <i>Industrial and Corporate Change</i> , 15(3), 467–496.                                                                                         | 3 | 4% |  |
| Hsu, G. 2006. Jack of all trades and masters of none: Audiences’ reactions to spanning genres in feature film production. <i>Admin. Sci. Quart.</i> 51(3) 420–450.                                                                        | 7 | 9% |  |
| Johnson, C., T. J. Dowd, C. L. Ridgeway. 2006. Legitimacy as a social process. <i>Annual Rev. Sociol.</i> 32 53–78.                                                                                                                       | 5 | 6% |  |
| Kerlin JA (2006) Social enterprise in the United States and Europe: Understanding and learning from the differences. <i>Voluntas</i> 17(3):246–62                                                                                         | 2 | 3% |  |

|                                                                                                                                                                                                                                          |   |    |  |
|------------------------------------------------------------------------------------------------------------------------------------------------------------------------------------------------------------------------------------------|---|----|--|
| Klapper, L., L. Laeven, and R. Rajan 2006 “Entry regulation as a barrier to entrepreneurship.” <i>Journal of Financial Economics</i> , 82: 591–629.                                                                                      | 2 | 3% |  |
| Kuilman, J., and J. Li . 2006 “Organizers’ ecology: An empirical study of foreign banks in Shanghai.” <i>Organization Science</i> , 17: 385–401.                                                                                         | 2 | 3% |  |
| Lawrence, T. B., & Suddaby, R. 2006. Institutions and institutional work. In S. Clegg, C. Hardy, & W. Nord (Eds.), <i>Handbook of organization studies</i> : 215-254. London: Sage                                                       | 5 | 6% |  |
| Lenox MJ. 2006. The role of private decentralized institutions in sustaining industry self-regulation. <i>Organization Science</i> 17(6): 677–690.                                                                                       | 2 | 3% |  |
| Lowe, R. A., A. Ziedonis. 2006. Overoptimism and the performance of entrepreneurial firms. <i>Management Sci.</i> 52(2) 173–186.                                                                                                         | 3 | 4% |  |
| Maguire, S., & Hardy, C. 2006. The emergence of new global institutions: A discursive perspective. <i>Organization Studies</i> , 27: 7–29.                                                                                               | 2 | 3% |  |
| Mair, J., & Marti, I. 2006. Social entrepreneurship research: A source of explanation, prediction, and delight. <i>Journal of World Business</i> , 41: 36-44                                                                             | 3 | 4% |  |
| Maurer, I., & Ebers, M. 2006. Dynamics of social capital and their performance implications: Lessons from biotechnology start-ups. <i>Administrative Science Quarterly</i> , 51: 262–292.                                                | 3 | 4% |  |
| McMullen, J. S., & Shepherd, A. 2006. Entrepreneurial action and the role of uncertainty in the theory of the entrepreneur. <i>Academy of Management Review</i> , 31: 132-                                                               | 6 | 8% |  |
| Rao, H., and S. Giorgi 2006 “Code breaking: How cultural entrepreneurs exploit cultural logics to generate institutional change.” In B. M. Staw (ed.), <i>Research in Organizational Behavior</i> , 27: 279–314. New York: Elsevier/JAI. | 3 | 4% |  |
| Reay T, Golden-Biddle K, Germann K (2006) Legitimizing a new role: Small wins and microprocesses of change. <i>Acad. Management J.</i> 49(5):977–998.                                                                                    | 2 | 3% |  |
| Ridgeway CL, Correll SJ (2006) Consensus and the creation of status beliefs. <i>Soc. Forces</i> 85(1):431–453.                                                                                                                           | 2 | 3% |  |
| Rindova, V. P., T. G. Pollock, and M. L. A. Hayward 2006 “Celebrity firms: The social construction of market popularity.” <i>Academy of Management Review</i> , 31: 50–71.                                                               | 4 | 5% |  |
| Sine, W. D., Mitsuhashi, H., & Kirsch, D. A. 2006. Revisiting Burns and Stalker: Formal structure and new venture performance in emerging economic sectors. <i>Academy of Management Journal</i> , 49: 121–132.                          | 5 | 6% |  |
| Soule, S. A., and B. G. King 2006 “The stages of the policy process and the Equal Rights Amendment, 1972–1982.” <i>American Journal of Sociology</i> , 111: 1871–1909.                                                                   | 3 | 4% |  |

|                                                                                                                                                                                                                      |   |    |  |
|----------------------------------------------------------------------------------------------------------------------------------------------------------------------------------------------------------------------|---|----|--|
| Stuart TE, Ding WW (2006) When do scientists become entrepreneurs? The social structural antecedents of commercial activity in the academic life sciences. <i>Amer. J. Sociol.</i> 112(1):97–144.                    | 4 | 5% |  |
| Wade, J. B., J. F. Porac, T. G. Pollock, and S. D. Graffi n 2006 “The burden of celebrity: The impact of CEO certification contests on CEO pay and performance.” <i>Academy of Management Journal</i> , 49: 643–660. | 3 | 4% |  |
| Weber, K., M. A. Glynn. 2006. Making sense with institutions: Context, thought and action in Karl Weick’s theory. <i>Organ. Stud.</i> 27(11) 1639–1660.                                                              | 5 | 6% |  |
| Whetten, D. A. 2006. Albert and Whetten revisited: Strengthening the concept of organizational identity. <i>J. Management Inquiry</i> 15(3) 219–234                                                                  | 4 | 5% |  |
| Zilber, T. B. 2006. The work of the symbolic in institutional processes: Translations of rational myths in Israeli hitech. <i>Academy of Management Journal</i> , 49: 279-301.                                       | 2 | 3% |  |

**Table 2 Detailed list of the 12 Clusters identified**

| <b>Cluster</b> | <b>Articles</b>                                                                                                                                                                                                                                                                                                                                                                                                                                                                                                                                                                                                                                      | <b>Topic</b>                                                                                                                                        |
|----------------|------------------------------------------------------------------------------------------------------------------------------------------------------------------------------------------------------------------------------------------------------------------------------------------------------------------------------------------------------------------------------------------------------------------------------------------------------------------------------------------------------------------------------------------------------------------------------------------------------------------------------------------------------|-----------------------------------------------------------------------------------------------------------------------------------------------------|
| 1              | Calas, M. B., Smircich, L., & Bourne, K. A. (2009); Dimitriadis, S., Lee, M., Ramarajan, L., & Battilana, J. (2017); Lee, M., & Huang, L. (2018); Thébaud, S. (2015); Tonoyan, V., Strohmeier, R., & Jennings, J. E. (2019)                                                                                                                                                                                                                                                                                                                                                                                                                          | The effect of gender on entrepreneurship, and vice versa                                                                                            |
| 2              | Aldrich, H. E., & Fiol, C. M. (1994); Barlow, M. A., Verhaal, J. C., & Angus, R. W. (2019); Carnabuci, G., Operti, E., & Kovacs, B. (2015); Georgallis, P., Dowell, G., & Durand, R. (2018); Kacperczyk, A., & Younkin, P. (2017); Lee, B. H., Hiatt, S. R., & Lounsbury, M. (2017); McDonald, R. M., & Eisenhardt, K. M. (2019); McDonald, R., & Gao, C. (2019); Santos, F. M., & Eisenhardt, K. M. (2009); Tracey, P., Dalpiaz, E., & Phillips, N. (2018); Wry, T., Lounsbury, M., & Jennings, P. D. (2014)                                                                                                                                        | Categorization & managing categorical expectations                                                                                                  |
| 3              | Assenova, V. A., & Sorenson, O. (2017); Eberhart, R. N., Eesley, C. E., & Eisenhardt, K. M. (2017); Eesley, C. (2016); Eesley, C., Li, J. B., & Yang, D. (2016); Hiatt, S. R., Sine, W. D., & Tolbert, P. S. (2009); Hiatt, S. R., & Sine, W. D. (2014); Hiatt, S. R., Carlos, W. C., & Sine, W. D. (2018); Sine, W. D., Haveman, H. A., & Tolbert, P. S. (2005); Sine, W. D., David, R. J., & Mitsuhashi, H. (2007); Sine, W. D., & Lee, B. H. (2009); Spencer, J. W., Murtha, T. P., & Lenway, S. A. (2005); Vaccaro, A., & Palazzo, G. (2015); Webb, J. W., Tihanyi, L., Ireland, R. D., & Sirmon, D. G. (2009); Li, X. H., & Liang, X. Y. (2015) | The effect of social and political institutional forces on entrepreneurial activity (entry, failure & the emergence of new markets), and vice versa |
| 4              | Armanios, D. E., Eesley, C. E., Li, J. Z., & Eisenhardt, K. M. (2017); Batjargal, B., Hitt, M. A., Tsui, A. S., Arregle, J. L., Webb, J. W., & Miller, T. L. (2013); Dutt, N., Hawn, O., Vidal, E., Chatterji, A., McGahan, A., & Mitchell, W. (2016); George, G., & Prabhu, G. N. (2000);                                                                                                                                                                                                                                                                                                                                                           | The role of Institutional Intermediaries in filling institutional voids                                                                             |
| 5              | Fisher, G., Kotha, S., & Lahiri, A. (2016); Garud, R., Schildt, H. A., & Lant, T. K. (2014); Lounsbury, M., & Glynn, M. A. (2001); Navis, C., & Glynn, M. A. (2010); Navis, C., & Glynn, M. A. (2011); Wry, T., Lounsbury, M., & Glynn, M. A. (2011)                                                                                                                                                                                                                                                                                                                                                                                                 | Temporal dynamics of identity & legitimacy                                                                                                          |
| 6              | Canales, R. (2016); David, R. J., Sine, W. D., & Haveman, H. A. (2013); Haveman, H. A., Habinek, J., & Goodman, L. A. (2012); Tracey, P., Phillips, N., & Jarvis, O. (2011); Weber, K., Heinze, K. L., & DeSoucey, M.                                                                                                                                                                                                                                                                                                                                                                                                                                | Emergence of new organizational forms & markets                                                                                                     |

|    |                                                                                                                                                                                                                                                                                                                                                                                                                                                              |                                                                                                                              |
|----|--------------------------------------------------------------------------------------------------------------------------------------------------------------------------------------------------------------------------------------------------------------------------------------------------------------------------------------------------------------------------------------------------------------------------------------------------------------|------------------------------------------------------------------------------------------------------------------------------|
|    | (2008); Zilber, T. B. (2006)                                                                                                                                                                                                                                                                                                                                                                                                                                 |                                                                                                                              |
| 7  | Hargadon, A. B., & Douglas, Y. (2001), Henfridsson, O., & Yoo, Y. J. (2014), King, B. G., Clemens, E. S., & Fry, M. (2011), Tracey, P., Phillips, N., & Jarvis, O. (2011), Zilber, T. B. (2006)                                                                                                                                                                                                                                                              | Identity formation & legitimacy                                                                                              |
| 8  | Almandoz, J. (2012); Almandoz, J. (2014); Pache, A. C., & Santos, F. (2013); Pahnke, E. C., Katila, R., & Eisenhardt, K. M. (2015); Souitaris, V., Zerbini, S., & Liu, G. (2012)                                                                                                                                                                                                                                                                             | The effect of multiple institutional logics                                                                                  |
| 9  | Cohen, B. D., & Dean, T. J. (2005); Cornelissen, J. P., & Clarke, J. S. (2010); Granqvist, N., Grodal, S., & Woolley, J. L. (2013); Higgins, M. C., & Gulati, R. (2003); Higgins, M. C., & Gulati, R. (2006); Khaire, M. (2010); Lanahan, L., & Armanios, D. (2018); Petkova, A. P., Rindova, V. P., & Gupta, A. K. (2013); Plummer, L. A., Allison, T. H., & Connelly, B. L. (2016); Zimmerman, M. A., & Zeitz, G. J. (2002); Zott, C., & Huy, Q. N. (2007) | Symbolic management & resource acquisition                                                                                   |
| 10 | Bercovitz, J., & Feldman, M. (2008); Feldman, M. P., Ozcan, S., & Reichstein, T. (2019); Hsu, D. H., & Lim, K. (2014); Kacperczyk, A. J. (2013); Mata, J., & Alves, C. (2018); Tan, D., & Tan, J. (2017)                                                                                                                                                                                                                                                     | The effect of founder prior organizational affiliation on entrepreneurial entry & founder imprinting effects on new ventures |
| 11 | Pacheco, D. F., York, J. G., & Hargrave, T. J. (2014); York, J. G., & Lenox, M. J. (2014)                                                                                                                                                                                                                                                                                                                                                                    | Differential effects of social movements on new ventures, and vice versa                                                     |
| 12 | Cattani, G., Ferriani, S., Negro, G., & Perretti, F. (2008); Dobrev, S. D., Ozdemir, S. Z., & Teo, A. C. (2006); Gurses, K., & Ozcan, P. (2015)                                                                                                                                                                                                                                                                                                              | Ecological legitimacy transfers from existing organizations and organizational forms to emerging ones                        |

**Figure 1 pyLDAvis Topic Model**

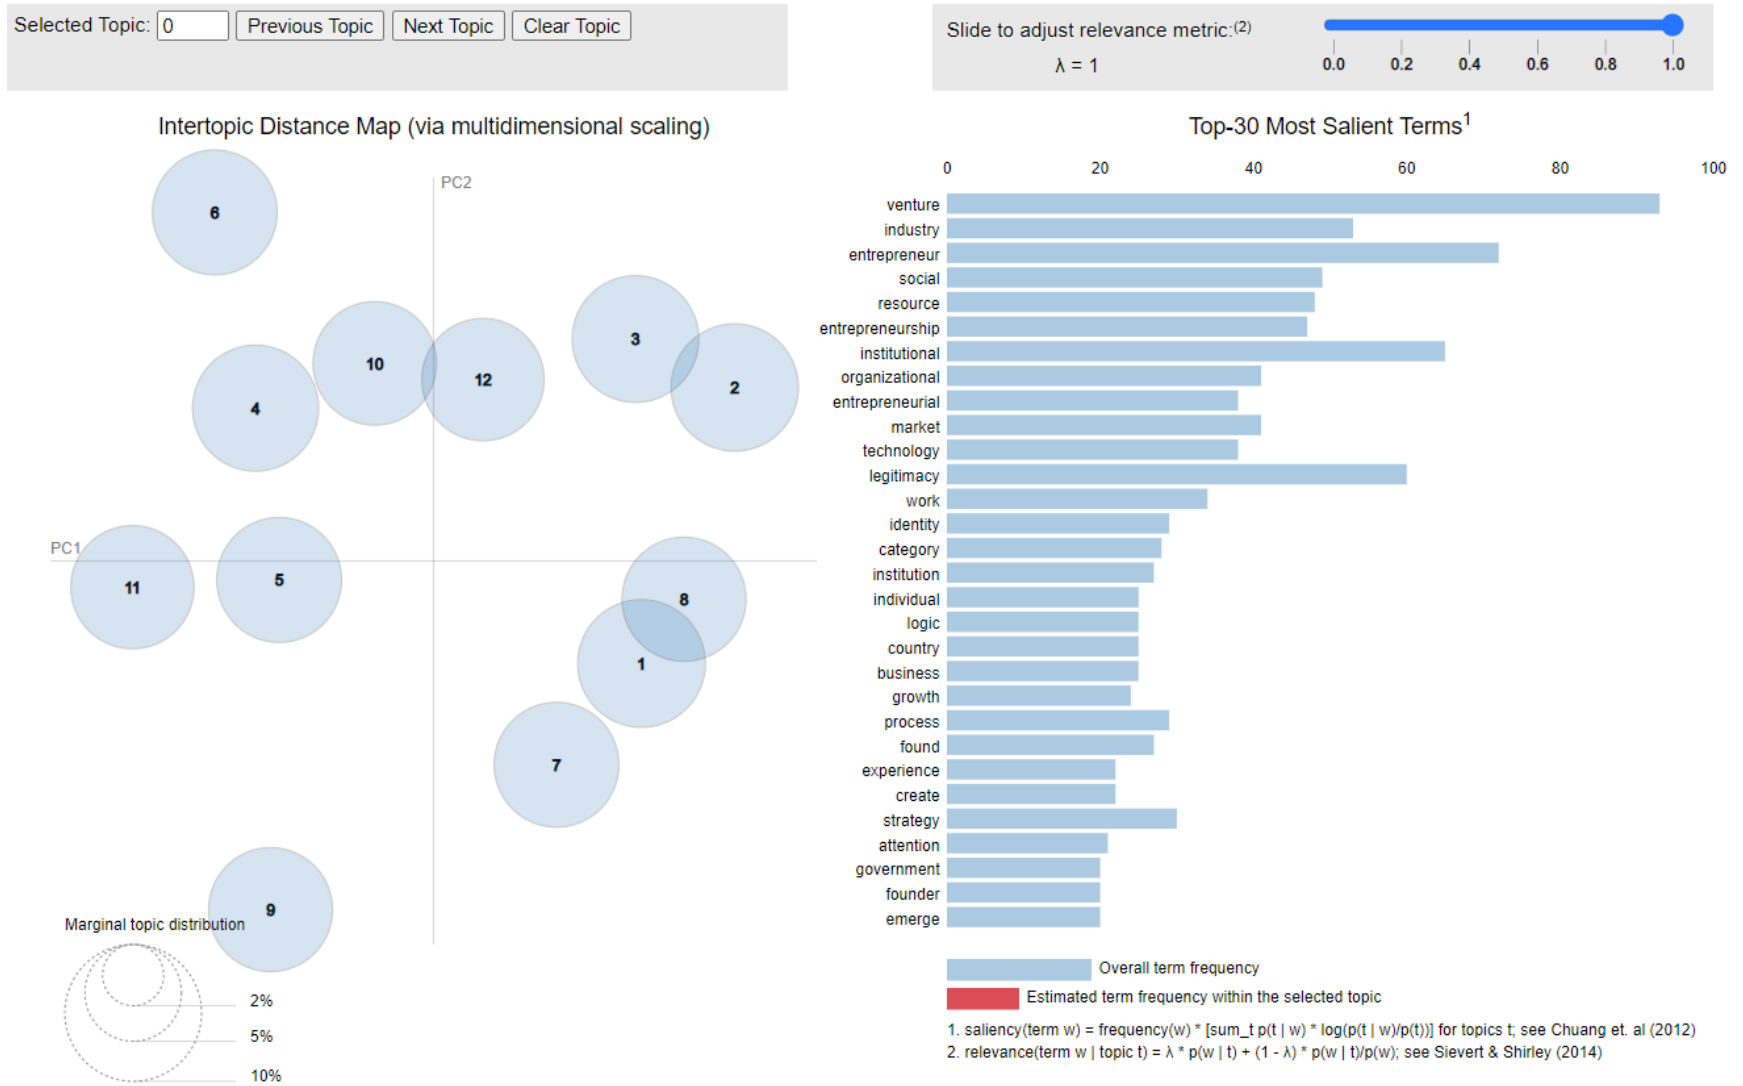

Supplement: orsc.2022.1586.sm1.pdf [file orsc.2022.1586.sm1.pdf]
